# Supplementary material for: National primary care responses to COVID-19: a rapid review of the literature
Source: PubMed Central journal article supplement — BMJ Open. 2020 Dec 8;10(12):e041622. doi: 10.1136/bmjopen-2020-041622 (PMC7725079; doi:10.1136/bmjopen-2020-041622), 2020-12-08
Supplement: bmjopen-2020-041622supp001.pdf [file bmjopen-2020-041622supp001.pdf]

Supplementary Material 1: Overview of the study documents

| Country     | Source                                                                                         | Date Pub. | Title                                                                                                      |
|-------------|------------------------------------------------------------------------------------------------|-----------|------------------------------------------------------------------------------------------------------------|
| Australia   | Communicable Disease Network                                                                   | 24-Apr-20 | Coronavirus Disease 2019 (COVID-19) CDNA National Guidelines for Public Health Units v. 2.7                |
| Canada      | Government of Canada                                                                           | 19-Apr-20 | Coronavirus disease (COVID-19): For health professionals                                                   |
| Canada      | Government of Canada                                                                           | 16-Apr-20 | COVID-19 Pandemic Guidance for the Health Care Sector                                                      |
| China       | National Health Commission                                                                     | 07-Mar-20 | Implementation plan for COVID-19 prevention and control by the National Health Commission (Version 6)      |
| China       | National Health Commission                                                                     | 04-Mar-20 | Guidelines for the Diagnosis and Treatment of COVID-19 by the National Health Commission (Trial Version 7) |
| Ethiopia    | Federal Ministry of Health                                                                     | 01-Apr-20 | National Comprehensive COVID19 Management Handbook First Edition                                           |
| India       | Government of India Ministry of Health & Family Welfare Directorate General of Health Services | 01-Apr-20 | COVID-19 Book of Five Response and Containment Measures for ANM, ASHA, AWW                                 |
| Ireland     | Department of Health Ireland                                                                   | 03-Apr-20 | V3.0 Preliminary Guidance on Minimising Risk of Transmission of Respiratory Virus in GP Practice           |
| Malaysia    | Ministry of Health Malaysia                                                                    | 24-Mar-20 | Screening and Triaging                                                                                     |
| Malaysia    | Ministry of Health Malaysia                                                                    | 24-Mar-20 | Management of PUI as Outpatients                                                                           |
| New Zealand | Ministry of Health New Zealand                                                                 | 08-Apr-20 | Updated advice for health professionals: novel coronavirus (COVID-19)                                      |
| New Zealand | Ministry of Health New Zealand                                                                 | 10-Apr-20 | COVID-19: Primary care quick reference guide                                                               |
| Nigeria     | Nigeria Centre for Disease Control                                                             | 14-Mar-20 | National Interim Guidelines for Clinical Management of COVID 19                                            |
| Nigeria     | Nigeria Centre for Disease Control                                                             | 29-Feb-20 | Infection Prevention and Control: Recommendations during health care when COVID-19 is suspected            |
| Philippines | Republic of the Philippines Department of Health                                               | 11-Apr-20 | Interim guidelines on health care provider networks during the COVID-19 pandemic                           |

|                |                                               |           |                                                                                                                        |
|----------------|-----------------------------------------------|-----------|------------------------------------------------------------------------------------------------------------------------|
| South Africa   | Department of Health Republic of South Africa | 27-Mar-20 | Clinical management of suspected or confirmed COVID-19 disease                                                         |
| Sri Lanka      | Ministry of Health                            | 23-Apr-20 | COVID-19 (New Coronavirus) Outbreak in Sri Lanka Interim Guidelines for Sri Lankan Primary Care Physicians Version 3.1 |
| United Kingdom | NHS England                                   | 06-Apr-20 | Guidance and standard operating procedures: General practice in the context of coronavirus (COVID-19) Version 2.1      |
| United States  | Centers for Disease Control and Prevention    | 07-Apr-20 | Outpatient and Ambulatory Care Settings: Responding to Community Transmission of COVID-19 in the United States         |
